# Supplementary material
Source: Research Square preprint supplement (doi:10.21203/rs.3.rs-9656294/v1)
Supplement: Supplementary file 2 [file 592412cb1b15e3d77d7f7d1d.pdf]

1 Supplementary Materials for manuscript “**China’s clean air and climate policies help improve**  
2 **farmers’ incomes and reduce socioeconomic inequity via mitigating ozone pollution**” authored by  
3 Mao et al. (2026)

4 **GCHP model simulation.** GEOS-Chem, a global 3D chemical transport model (CTM) equipped with  
5 a detailed gas-phase mechanism of NO<sub>x</sub>-VOC-O<sub>3</sub> chemistry, is widely used to estimate regional or  
6 global surface O<sub>3</sub> concentrations. A high-performance capability for GEOS-Chem (GCHP), with the  
7 identical source code for physical and chemical mechanisms with GEOS-Chem, was developed to take  
8 advantage of massively parallel computing architectures <sup>1,2</sup>. In this study, we used GCHP version  
9 13.2.1 with full tropospheric chemistry, driven by assimilated meteorological data from Modern-Era  
10 Retrospective Analysis for Research and Applications, Version 2 (MERRA2), to estimate surface O<sub>3</sub>  
11 at a horizontal resolution of C48 (~2.0° latitude × 2.5° longitude) and 72 vertical layers. Dry deposition  
12 for gases and aerosols is diagnosed based on the resistance-in-series scheme <sup>3</sup> in the base version.  
13 Biogenic VOC emissions are computed by the Model of Emissions of Gases and Aerosols from Nature  
14 (MEGAN) v2.1 <sup>4</sup>, which is embedded in GCHP. Biomass burning emissions are from the Global Fire  
15 Emissions Database (GFED4) inventory <sup>5</sup>. The global monthly anthropogenic emissions of BC, OC,  
16 NH<sub>3</sub>, NO<sub>x</sub>, SO<sub>2</sub> and NMVOCs are from the Community Emissions Data System (CEDS) <sup>6</sup>, while the  
17 anthropogenic emissions in China are obtained from the Multiresolution Emission Inventory (MEIC;  
18 <http://meicmodel.org.cn/>).

19 Our baseline simulation [CTRL] was performed representative of 2015, and three additional  
20 experiments with mitigation controls were conducted to examine the long-term individual and  
21 synergistic effects of clean air (CA) and carbon neutrality (CN) policies on crop production by 2060:  
22 CA\_2060, CN\_2060, and CA\_CN\_2060. The future projected anthropogenic emissions in China are  
23 from the Dynamic Projection model for Emissions in China Version 1.2 (DPEC v1.2) developed by  
24 Tsinghua University to track China’s future greenhouse gases and air pollutant emissions from 2020  
25 to 2060 under a wide range of socioeconomic, climate, and pollution control policies. All simulations  
26 were performed for the same meteorological conditions of 2015 after an additional spin-up period of  
27 6 months.

28 **LightGBM model.** LightGBM is a machine learning (ML) algorithm based on the gradient-boosting

29 decision tree <sup>7</sup>, which has a high training efficiency and lower memory footprint and is thus suitable  
30 for processing massive high-dimensional data. In this study, we used to the LightGBM model to correct  
31 the bias of the GCHP-simulated O<sub>3</sub> fields for the present-day control scenario [CTRL].

32 To fully utilize the potential of big data and the integrative capabilities of ML, multiple-source  
33 datasets were used for model training and validation, including O<sub>3</sub> observations, anthropogenic  
34 emissions, meteorology, land use, topography and other auxiliary data. Hourly surface O<sub>3</sub> observations  
35 ( $\mu\text{g m}^{-3}$ ) from 2016 to 2018 were obtained from the China National Environmental Monitoring Center  
36 Network (<https://air.cnemc.cn:18007/>) established by the Ministry of Ecology and Environment of  
37 China. A total of 1016 sites were finally selected after removing sites with missing data rates greater  
38 than 5%. Also, the abnormal values greater than  $500 \mu\text{g m}^{-3}$  were deleted. The monthly historical  
39 (2015–2018) anthropogenic emissions of O<sub>3</sub> precursor gases, including NO<sub>x</sub>, NMVOCs and CO were  
40 obtained from the same input datasets used by GCHP <sup>8</sup>. Hourly reanalysis data for meteorological  
41 variables were obtained from the fifth-generation European Centre for Medium-Range Weather  
42 Forecasts (ECMWF) reanalysis dataset (ERA5) with a spatial resolution of  $0.25^\circ \times 0.25^\circ$   
43 (<https://cds.climate.copernicus.eu/>). The national land-use data with a spatial resolution of  $30 \text{ m} \times 30$   
44  $\text{m}$  for 2015 were provided by Yang and Huang <sup>9</sup>. Nationwide topography data at a resolution of  
45  $1 \text{ km} \times 1 \text{ km}$  were provided by the Chinese Academy of Sciences  
46 (<https://www.resdc.cn/data.aspx?DATAID=123>), sourced from the latest Shuttle Radar Topography  
47 Mission (SRTM) v4.1 dataset produced by NASA. The  $1 \text{ km} \times 1 \text{ km}$  gridded real gross domestic  
48 product (GDP) for 2015 is provided by Chen et. al <sup>10</sup>. The population density data with a high-precision  
49 spatial resolution of 30 arcseconds in 2015 is provided by Liu et. al <sup>11</sup>. When predicting the gridded  
50 O<sub>3</sub> concentrations with the trained model, predictor variables at different spatial resolutions were all  
51 regridded to the same resolution of  $0.25^\circ \times 0.25^\circ$ , consistent with the ERA5 meteorological fields.

52 A timescale of 2 years strike a good balance between computational burden and model accuracy  
53 as training the model with 1 year or more of data only results in marginal improvements in model  
54 performances <sup>12</sup>. Here the LightGBM model was trained with samples over 2016–2017 and the 2018  
55 data independent of the model training process was used for model validation. The ozone observations  
56 from 2016 to 2018 used for validation were obtained from the China National Environmental  
57 Monitoring Center Network (<https://air.cnemc.cn:18007/>). A total of 1016 sites were selected after  
58 deleting the missing and abnormal data. The overall coefficient of determination ( $R^2$ ) values of the

59 hybrid approach and GCHP model are 0.67 and 0.42 at the hourly level. Bias-corrected ozone  
60 concentrations show lower root mean square errors (RMSEs) than GCHP-simulated concentrations,  
61 reduced from 36.3 to 25.8  $\mu\text{g m}^{-3}$  (**Figure S9**). The results suggest that the hybrid approach, by  
62 integrating process-based CTM outputs and multi-source datasets at higher resolutions, can deliver  
63 more accurate ozone predictions. Comparable performance on both the training and test datasets  
64 (**Figure S10**) indicates no obvious overfitting. This generalization capacity justifies its use in bias-  
65 correcting the GCHP-simulated ozone fields for the [CTRL] scenario.

66

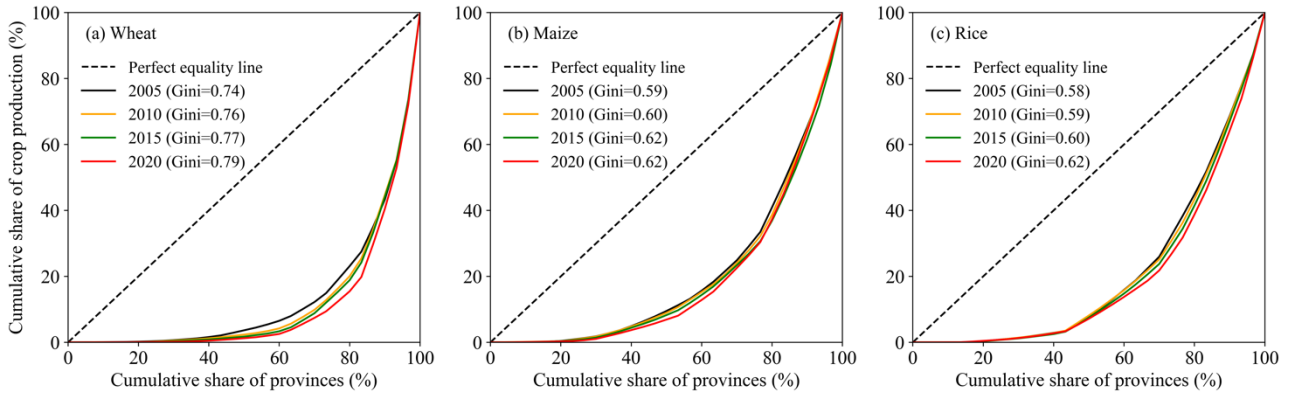

68  
69 **Figure S1.** The Lorenz curve and Gini coefficient for the production of three major crops from 2005  
70 to 2020: (a) wheat, (b) maize, and (c) rice.

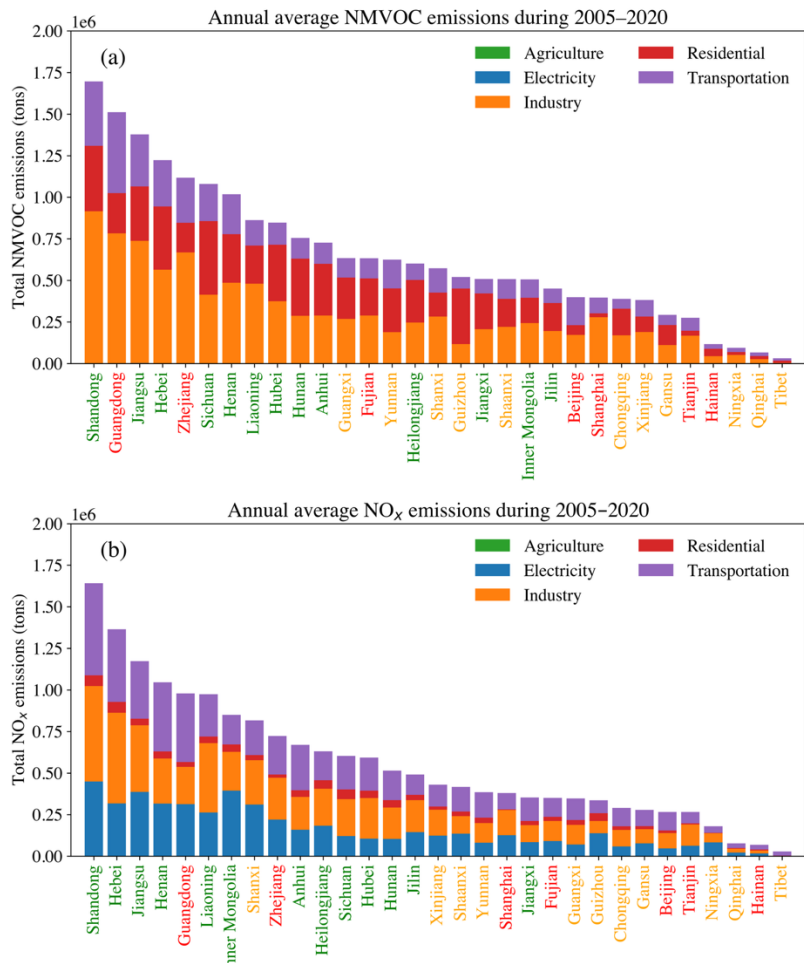

71  
72 **Figure S2.** Annual average emissions of (a) NMVOC and (b) NO<sub>x</sub> across provinces from 2005 to 2020  
73 by different emission sectors.

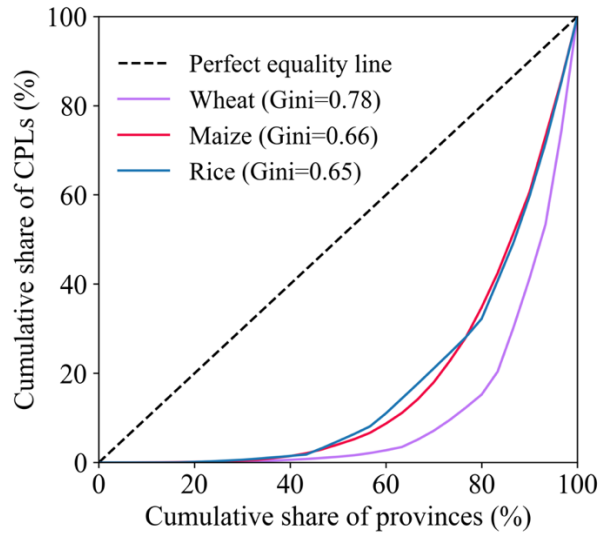

75

76 **Figure S3.** Lorenz curve and Gini coefficient for present-day crop production losses (CPLs) for wheat,  
 77 maize, and rice.

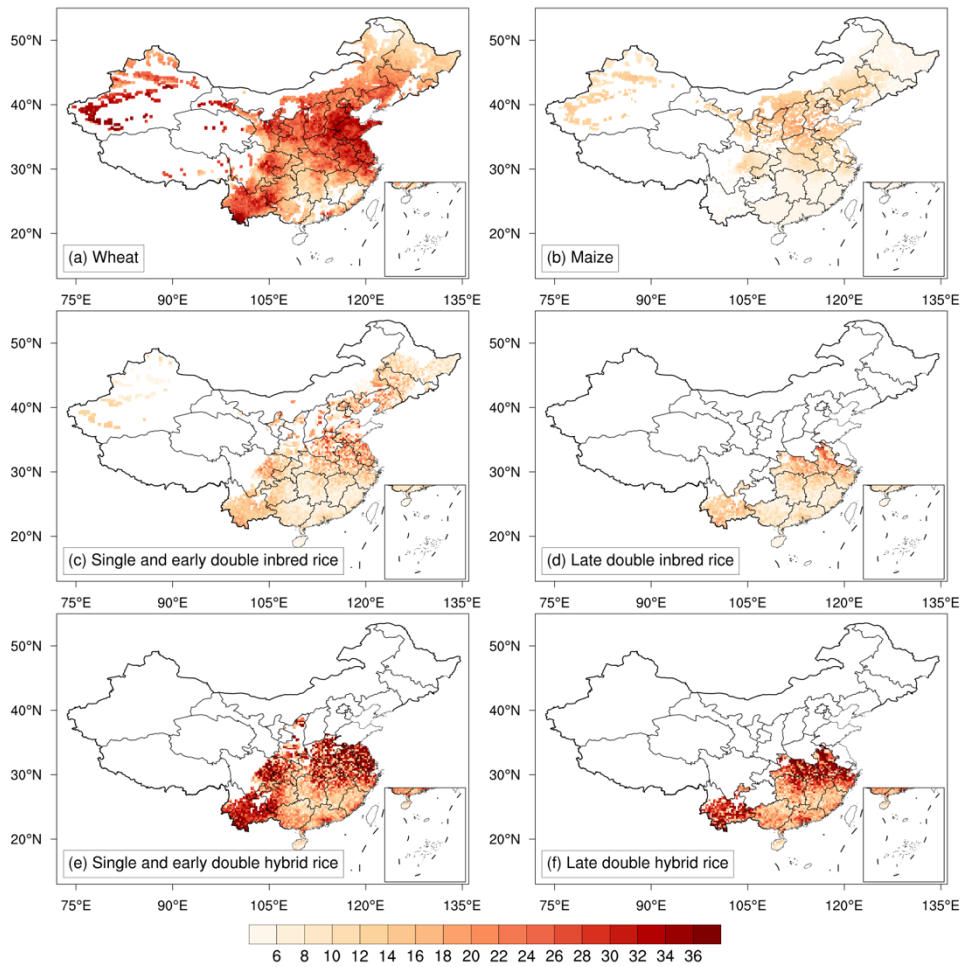

79 **Figure S4.** Present-day relative yield losses (RYLs, %) for different crops in China, calculated from  
 80 Asian-specific exposure–RY relationships: (a) wheat, (b) maize, (c) single and early double crop inbred  
 81 rice, (d) late double crop inbred rice, (e) single and early double crop hybrid rice, and (f) late double  
 82 crop hybrid rice.

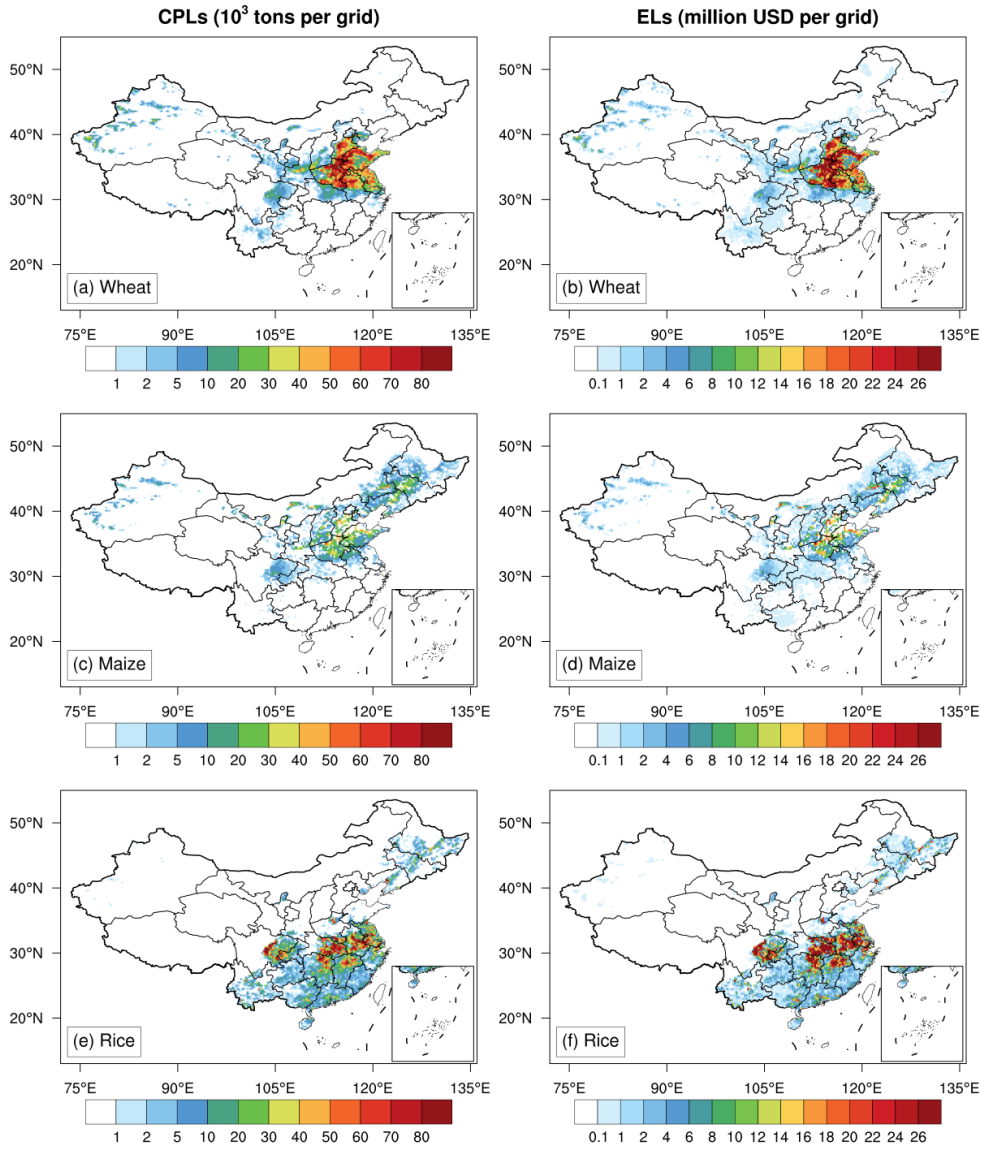

83

84 **Figure S5.** Ozone-induced crop production losses (CPLs; in thousand metric tons per 0.25°×0.25° grid  
 85 cell) for: (a) wheat, (c) maize, and (e) rice, and the corresponding economic losses (ELs; in million  
 86 USD per 0.25°×0.25° grid cell) for (b) wheat, (d) maize, and (f) rice.

87

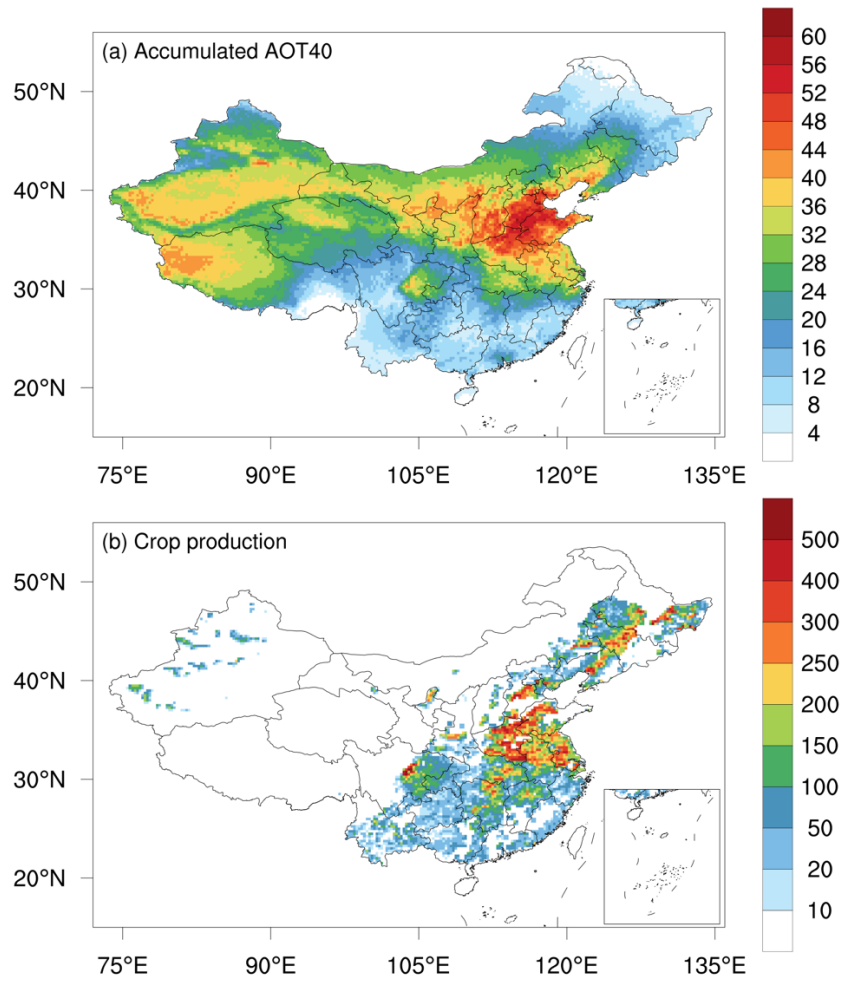

88

89 **Figure S6.** (a) Accumulated AOT40 ( $10^3$  ppb) during the major growing season (April–September) in  
 90 2015; (b) total production of the three major crops (in thousand metric tons per  $0.25^\circ \times 0.25^\circ$  grid cell)  
 91 in 2015.

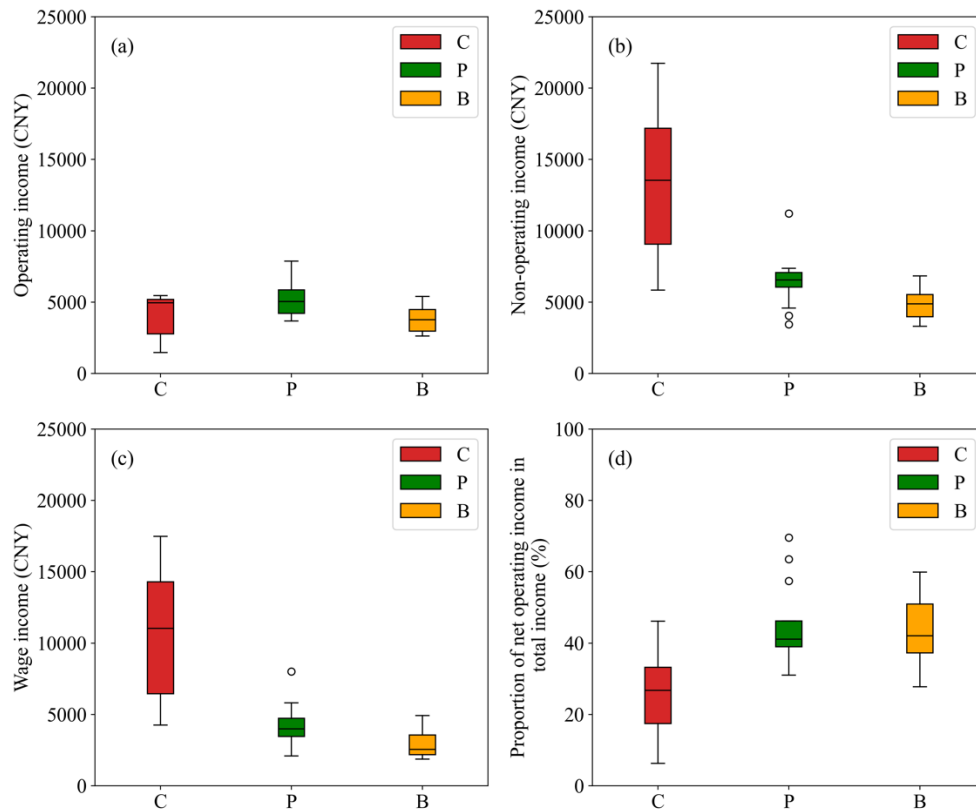

92

93 **Figure S7.** Sources of rural residents' disposable income: (a) net operating income, (b) non-operating  
 94 income, (c) wage income, and (d) the proportion of net operating income in total income. According  
 95 to the National Bureau of Statistics of China (NBSC), disposable income comprises four components:  
 96 wage income, net operating income, net property income, and net transfer income. Net operating  
 97 income refers to the net income obtained by households or household members from production and  
 98 business activities, such as farmers earning income from agricultural production. Wage income refers  
 99 to the total labor remuneration and various benefits obtained by employed individuals through different  
 100 means, including wages and benefits from employment with organizations or individuals, as well as  
 101 earnings from freelance work, part-time jobs, and occasional labor.

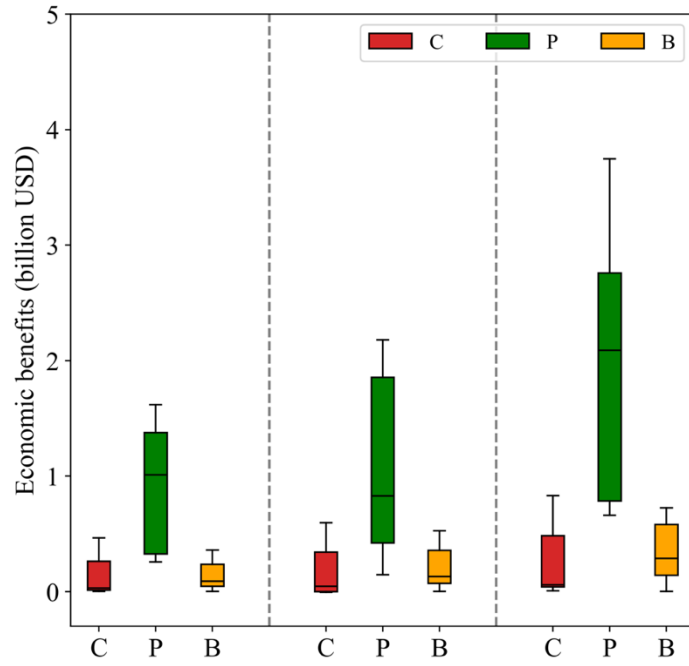

102

103 **Figure S8.** Boxplot of provincial economic benefits due to reduced CPLs under various policy

104 scenarios across food functional region.

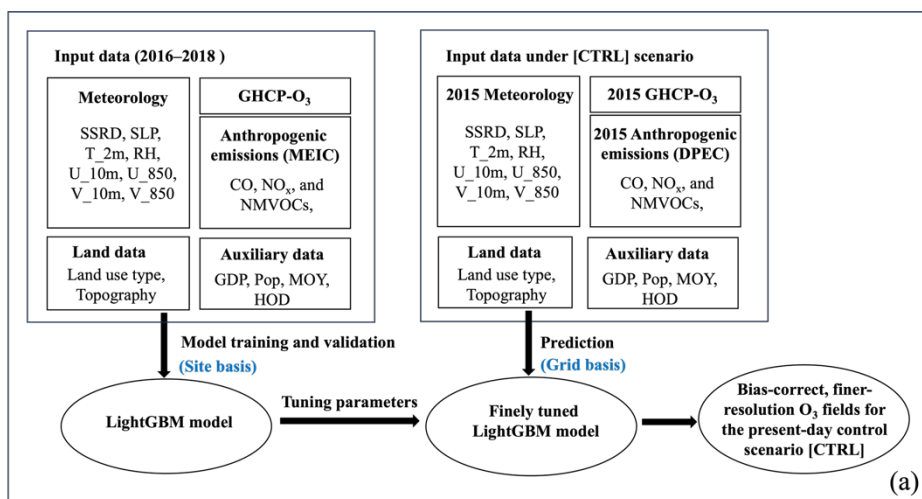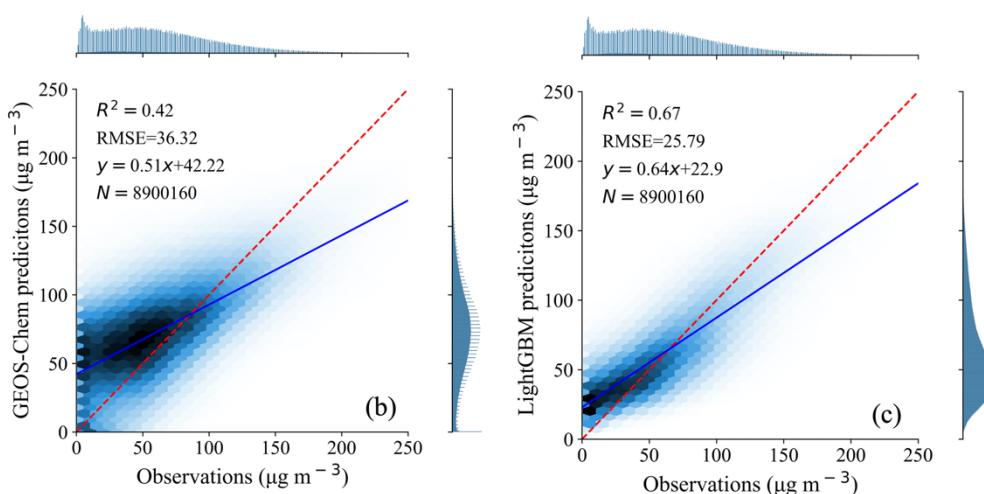

105

106

107

108

109

110

111

112

113

114

115

116

**Figure S9.** (a) Flowchart illustrating the hybrid approach for predicting present-day and future ozone concentrations under various scenarios, with abbreviations and detailed information of variables provided in **Table S1**. Density scatterplots and linear regression statistics of ozone predictions vs. observations for 2018 independent of the process of model training: (b) GCHP-simulated hourly ozone vs. observations, and (c) bias-corrected hourly ozone vs. observations. The model results are sampled at the same site locations. The dashed red line represents the 1:1 line, and the solid blue line shows the orthogonal regression line of best fit.  $R^2$  is the coefficient of determination, RMSE is the root mean square error, and  $N$  is the number of data points. The original unit of GCHP-simulated ozone is parts per billion (ppb), which was converted to  $\mu\text{g m}^{-3}$  assuming a constant temperature of 25 °C and pressure of 1013.25 hPa ( $1 \mu\text{g m}^{-3}$  is approximately 0.5 ppb) for comparison with observations.

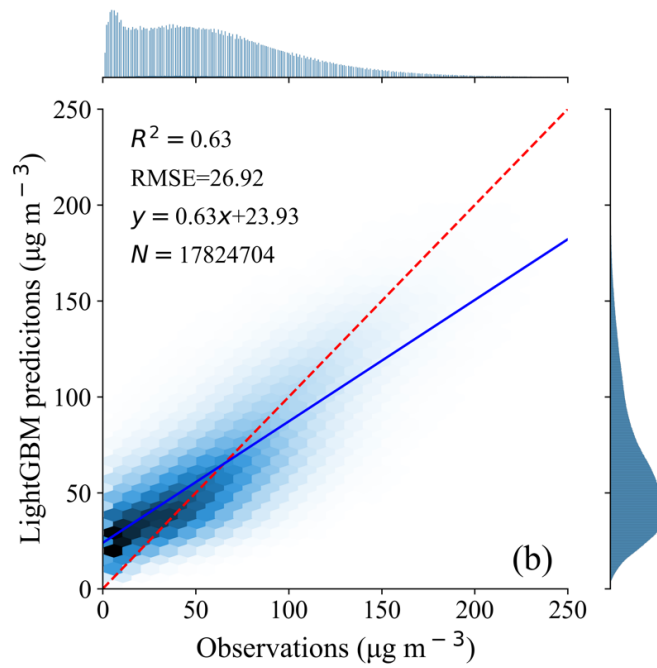

117

118 **Figure S10.** Density scatterplots and linear regression statistics of LightGBM O<sub>3</sub> predictions (μg m<sup>-3</sup>)  
119 compared with observations for 2016–2017 training data. The dashed red line represents the 1:1 line,  
120 and the solid blue line shows the orthogonal regression line of best fit.  $R^2$  is the coefficient of  
121 determination, RMSE is the root mean square error, and  $N$  is the number of data points.

122

124 **Table S1.** Provincial production of three major grain crops (Mt) in 2015 and corresponding types:  
 125 producing areas (P), balanced production areas (B) and consuming areas (C).

| <b>Provinces</b>      | <b>Wheat</b> | <b>Maize</b> | <b>Rice</b> | <b>Total</b> | <b>Type</b> |
|-----------------------|--------------|--------------|-------------|--------------|-------------|
| <b>Beijing</b>        | 0.11         | 0.49         | 0.00        | 0.6          | C           |
| <b>Tianjin</b>        | 0.60         | 1.07         | 0.11        | 1.78         | C           |
| <b>Hebei</b>          | 14.35        | 16.70        | 0.55        | 31.6         | P           |
| <b>Shanxi</b>         | 2.71         | 8.63         | 0.00        | 11.34        | B           |
| <b>Inner Mongolia</b> | 1.58         | 22.51        | 0.53        | 24.62        | P           |
| <b>Liaoning</b>       | 0.03         | 14.04        | 4.68        | 18.75        | P           |
| <b>Jilin</b>          | 0.00         | 28.06        | 6.30        | 34.36        | P           |
| <b>Heilongjiang</b>   | 0.22         | 35.44        | 22.00       | 57.66        | P           |
| <b>Shanghai</b>       | 0.20         | 0.02         | 0.84        | 1.06         | C           |
| <b>Jiangsu</b>        | 11.74        | 2.52         | 19.52       | 33.78        | P           |
| <b>Zhejiang</b>       | 0.35         | 0.31         | 5.78        | 6.44         | C           |
| <b>Anhui</b>          | 14.11        | 4.96         | 14.59       | 33.66        | P           |
| <b>Fujian</b>         | 0.01         | 0.21         | 4.85        | 5.07         | C           |
| <b>Jiangxi</b>        | 0.03         | 0.13         | 20.27       | 20.43        | P           |
| <b>Shandong</b>       | 23.47        | 20.51        | 0.95        | 44.93        | P           |
| <b>Henan</b>          | 35.01        | 18.54        | 5.32        | 58.87        | P           |
| <b>Hubei</b>          | 4.21         | 3.33         | 18.11       | 25.65        | P           |
| <b>Hunan</b>          | 0.09         | 1.89         | 26.45       | 28.43        | P           |
| <b>Guangdong</b>      | 0.00         | 0.78         | 10.88       | 11.66        | C           |
| <b>Guangxi</b>        | 0.01         | 2.81         | 11.38       | 14.2         | B           |
| <b>Hainan</b>         | 0.00         | 0.00         | 1.53        | 1.53         | C           |
| <b>Chongqing</b>      | 0.23         | 2.60         | 5.06        | 7.89         | B           |
| <b>Sichuan</b>        | 4.26         | 7.66         | 15.53       | 27.45        | P           |
| <b>Guizhou</b>        | 0.62         | 3.24         | 4.18        | 8.04         | B           |
| <b>Yunnan</b>         | 0.91         | 7.47         | 6.60        | 14.98        | B           |

|                 |      |      |      |       |   |
|-----------------|------|------|------|-------|---|
| <b>Tibet</b>    | 0.23 | 0.01 | 0.00 | 0.24  | B |
| <b>Shaanxi</b>  | 4.58 | 5.43 | 0.92 | 10.93 | B |
| <b>Gansu</b>    | 2.81 | 5.77 | 0.03 | 8.61  | B |
| <b>Qinghai</b>  | 0.34 | 0.19 | 0.00 | 0.53  | B |
| <b>Ningxia</b>  | 0.40 | 2.27 | 0.61 | 3.28  | B |
| <b>Xinjiang</b> | 6.98 | 7.05 | 0.65 | 14.68 | B |

126 **Table S2.** Provincial crop production losses (CPLs; Mt) of three major grain crops and total economic  
127 losses (ELs; billion USD) in 2015.

| <b>Provinces</b>      | <b>Wheat CPLs</b> | <b>Maize CPLs</b> | <b>Rice CPLs</b> | <b>Total CPLs</b> | <b>Total ELs</b> |
|-----------------------|-------------------|-------------------|------------------|-------------------|------------------|
| <b>Beijing</b>        | 0.04              | 0.02              | 0.00             | 0.06              | 0.02             |
| <b>Tianjin</b>        | 0.27              | 0.15              | 0.01             | 0.43              | 0.17             |
| <b>Hebei</b>          | 6.43              | 2.12              | 0.10             | 8.65              | 3.41             |
| <b>Shanxi</b>         | 1.05              | 1.61              | 0.00             | 2.66              | 1.09             |
| <b>Inner Mongolia</b> | 0.39              | 2.96              | 0.08             | 3.43              | 1.47             |
| <b>Liaoning</b>       | 0.01              | 1.81              | 0.90             | 2.72              | 1.24             |
| <b>Jilin</b>          | 0.00              | 2.17              | 0.81             | 2.98              | 1.35             |
| <b>Heilongjiang</b>   | 0.03              | 1.24              | 1.88             | 3.15              | 1.50             |
| <b>Shanghai</b>       | 0.08              | 0.00              | 0.15             | 0.23              | 0.10             |
| <b>Jiangsu</b>        | 5.29              | 0.26              | 4.81             | 10.36             | 4.56             |
| <b>Zhejiang</b>       | 0.13              | 0.02              | 1.65             | 1.8               | 0.89             |
| <b>Anhui</b>          | 5.82              | 0.73              | 6.70             | 13.25             | 5.92             |
| <b>Fujian</b>         | 0.00              | 0.00              | 0.87             | 0.87              | 0.44             |
| <b>Jiangxi</b>        | 0.01              | 0.01              | 4.86             | 4.88              | 2.47             |
| <b>Shandong</b>       | 11.21             | 2.98              | 0.17             | 14.36             | 5.63             |
| <b>Henan</b>          | 13.58             | 3.38              | 2.35             | 19.31             | 7.81             |
| <b>Hubei</b>          | 1.29              | 0.27              | 8.24             | 9.8               | 4.78             |
| <b>Hunan</b>          | 0.02              | 0.10              | 5.85             | 5.97              | 3.01             |
| <b>Guangdong</b>      | 0.00              | 0.02              | 1.99             | 2.01              | 1.01             |
| <b>Guangxi</b>        | 0.00              | 0.10              | 1.94             | 2.04              | 1.03             |

|                  |      |      |      |       |      |
|------------------|------|------|------|-------|------|
| <b>Hainan</b>    | 0.00 | 0.00 | 0.17 | 0.17  | 0.09 |
| <b>Chongqing</b> | 0.06 | 0.21 | 1.88 | 2.15  | 1.07 |
| <b>Sichuan</b>   | 1.46 | 0.90 | 7.79 | 10.15 | 4.89 |
| <b>Guizhou</b>   | 0.17 | 0.03 | 0.97 | 1.17  | 0.57 |
| <b>Yunnan</b>    | 0.33 | 0.04 | 1.93 | 2.3   | 1.12 |
| <b>Tibet</b>     | 0.08 | 0.00 | 0.00 | 0.08  | 0.03 |
| <b>Shaanxi</b>   | 1.56 | 0.56 | 0.19 | 2.31  | 0.93 |
| <b>Gansu</b>     | 0.89 | 0.49 | 0.00 | 1.38  | 0.55 |
| <b>Qinghai</b>   | 0.10 | 0.00 | 0.00 | 0.1   | 0.04 |
| <b>Ningxia</b>   | 0.15 | 0.34 | 0.10 | 0.59  | 0.25 |
| <b>Xinjiang</b>  | 2.73 | 1.13 | 0.06 | 3.92  | 1.56 |

128 **Table S3.** Provincial CPLs (Mt) for wheat under different scenarios.

| <b>Province</b>       | <b>CA_2060</b> | <b>CN_2060</b> | <b>CA_CN_2060</b> |
|-----------------------|----------------|----------------|-------------------|
| <b>Beijing</b>        | 0.04           | 0.05           | 0.04              |
| <b>Tianjin</b>        | 0.29           | 0.33           | 0.25              |
| <b>Hebei</b>          | 6.39           | 7.46           | 5.36              |
| <b>Shanxi</b>         | 0.87           | 0.85           | 0.53              |
| <b>Inner Mongolia</b> | 0.36           | 0.34           | 0.28              |
| <b>Liaoning</b>       | 0.01           | 0.01           | 0.01              |
| <b>Jilin</b>          | 0.00           | 0.00           | 0.00              |
| <b>Heilongjiang</b>   | 0.03           | 0.03           | 0.02              |
| <b>Shanghai</b>       | 0.07           | 0.08           | 0.05              |
| <b>Jiangsu</b>        | 4.51           | 4.74           | 2.79              |
| <b>Zhejiang</b>       | 0.08           | 0.07           | 0.04              |
| <b>Anhui</b>          | 4.41           | 4.25           | 2.39              |
| <b>Fujian</b>         | 0.00           | 0.00           | 0.00              |
| <b>Jiangxi</b>        | 0.00           | 0.00           | 0.00              |
| <b>Shandong</b>       | 10.24          | 12.24          | 7.85              |
| <b>Henan</b>          | 11.28          | 11.98          | 7.49              |

|                  |      |      |      |
|------------------|------|------|------|
| <b>Hubei</b>     | 0.94 | 0.81 | 0.46 |
| <b>Hunan</b>     | 0.01 | 0.01 | 0.00 |
| <b>Guangdong</b> | 0.00 | 0.00 | 0.00 |
| <b>Guangxi</b>   | 0.00 | 0.00 | 0.00 |
| <b>Hainan</b>    | 0.00 | 0.00 | 0.00 |
| <b>Chongqing</b> | 0.04 | 0.03 | 0.02 |
| <b>Sichuan</b>   | 1.02 | 0.79 | 0.55 |
| <b>Guizhou</b>   | 0.12 | 0.10 | 0.07 |
| <b>Yunnan</b>    | 0.31 | 0.30 | 0.26 |
| <b>Tibet</b>     | 0.08 | 0.08 | 0.07 |
| <b>Shaanxi</b>   | 1.16 | 0.98 | 0.57 |
| <b>Gansu</b>     | 0.70 | 0.63 | 0.42 |
| <b>Qinghai</b>   | 0.09 | 0.09 | 0.07 |
| <b>Ningxia</b>   | 0.12 | 0.11 | 0.08 |
| <b>Xinjiang</b>  | 2.55 | 2.44 | 2.05 |

129 **Table S4.** Provincial CPLs (Mt) for maize under different scenarios.

| <b>Province</b>       | <b>CA_2060</b> | <b>CN_2060</b> | <b>CA_CN_2060</b> |
|-----------------------|----------------|----------------|-------------------|
| <b>Beijing</b>        | 0.01           | 0.01           | 0.01              |
| <b>Tianjin</b>        | 0.11           | 0.10           | 0.06              |
| <b>Hebei</b>          | 1.51           | 1.30           | 0.68              |
| <b>Shanxi</b>         | 1.08           | 0.82           | 0.41              |
| <b>Inner Mongolia</b> | 2.24           | 1.83           | 1.23              |
| <b>Liaoning</b>       | 1.22           | 1.00           | 0.48              |
| <b>Jilin</b>          | 1.39           | 1.20           | 0.58              |
| <b>Heilongjiang</b>   | 0.75           | 0.66           | 0.34              |
| <b>Shanghai</b>       | 0.00           | 0.00           | 0.00              |
| <b>Jiangsu</b>        | 0.16           | 0.11           | 0.04              |
| <b>Zhejiang</b>       | 0.01           | 0.01           | 0.00              |
| <b>Anhui</b>          | 0.43           | 0.26           | 0.09              |

|                  |      |      |      |
|------------------|------|------|------|
| <b>Fujian</b>    | 0.00 | 0.00 | 0.00 |
| <b>Jiangxi</b>   | 0.01 | 0.00 | 0.00 |
| <b>Shandong</b>  | 2.04 | 1.54 | 0.74 |
| <b>Henan</b>     | 2.19 | 1.52 | 0.71 |
| <b>Hubei</b>     | 0.16 | 0.09 | 0.04 |
| <b>Hunan</b>     | 0.05 | 0.03 | 0.01 |
| <b>Guangdong</b> | 0.00 | 0.00 | 0.00 |
| <b>Guangxi</b>   | 0.06 | 0.05 | 0.04 |
| <b>Hainan</b>    | 0.00 | 0.00 | 0.00 |
| <b>Chongqing</b> | 0.14 | 0.07 | 0.03 |
| <b>Sichuan</b>   | 0.53 | 0.33 | 0.17 |
| <b>Guizhou</b>   | 0.02 | 0.01 | 0.00 |
| <b>Yunnan</b>    | 0.02 | 0.02 | 0.01 |
| <b>Tibet</b>     | 0.00 | 0.00 | 0.00 |
| <b>Shaanxi</b>   | 0.37 | 0.27 | 0.13 |
| <b>Gansu</b>     | 0.35 | 0.30 | 0.21 |
| <b>Qinghai</b>   | 0.00 | 0.00 | 0.00 |
| <b>Ningxia</b>   | 0.24 | 0.21 | 0.13 |
| <b>Xinjiang</b>  | 1.00 | 0.97 | 0.82 |

130 **Table S5.** Provincial CPLs (Mt) for rice under different scenarios.

| <b>Province</b>       | <b>CA_2060</b> | <b>CN_2060</b> | <b>CA_CN_2060</b> |
|-----------------------|----------------|----------------|-------------------|
| <b>Beijing</b>        | 0.00           | 0.00           | 0.00              |
| <b>Tianjin</b>        | 0.01           | 0.01           | 0.01              |
| <b>Hebei</b>          | 0.09           | 0.10           | 0.08              |
| <b>Shanxi</b>         | 0.00           | 0.00           | 0.00              |
| <b>Inner Mongolia</b> | 0.07           | 0.07           | 0.06              |
| <b>Liaoning</b>       | 0.83           | 0.86           | 0.67              |
| <b>Jilin</b>          | 0.70           | 0.69           | 0.49              |
| <b>Heilongjiang</b>   | 1.64           | 1.61           | 1.22              |

|                  |      |      |      |
|------------------|------|------|------|
| <b>Shanghai</b>  | 0.14 | 0.16 | 0.11 |
| <b>Jiangsu</b>   | 3.98 | 4.00 | 2.58 |
| <b>Zhejiang</b>  | 1.00 | 0.80 | 0.43 |
| <b>Anhui</b>     | 4.31 | 3.55 | 1.94 |
| <b>Fujian</b>    | 0.37 | 0.24 | 0.11 |
| <b>Jiangxi</b>   | 2.55 | 1.76 | 0.82 |
| <b>Shandong</b>  | 0.15 | 0.17 | 0.12 |
| <b>Henan</b>     | 1.73 | 1.62 | 0.99 |
| <b>Hubei</b>     | 5.47 | 4.20 | 2.35 |
| <b>Hunan</b>     | 3.49 | 2.52 | 1.26 |
| <b>Guangdong</b> | 0.94 | 0.68 | 0.30 |
| <b>Guangxi</b>   | 1.21 | 0.88 | 0.59 |
| <b>Hainan</b>    | 0.11 | 0.08 | 0.06 |
| <b>Chongqing</b> | 1.34 | 0.87 | 0.53 |
| <b>Sichuan</b>   | 5.22 | 3.99 | 2.74 |
| <b>Guizhou</b>   | 0.68 | 0.53 | 0.35 |
| <b>Yunnan</b>    | 1.83 | 1.76 | 1.61 |
| <b>Tibet</b>     | 0.00 | 0.00 | 0.00 |
| <b>Shaanxi</b>   | 0.12 | 0.09 | 0.05 |
| <b>Gansu</b>     | 0.00 | 0.00 | 0.00 |
| <b>Qinghai</b>   | 0.00 | 0.00 | 0.00 |
| <b>Ningxia</b>   | 0.09 | 0.08 | 0.06 |
| <b>Xinjiang</b>  | 0.06 | 0.06 | 0.05 |

131 **Table S6.** Provincial ELs (billion USD) under different scenarios.

| <b>Province</b> | <b>CA_2060</b> | <b>CN_2060</b> | <b>CA_CN_2060</b> |
|-----------------|----------------|----------------|-------------------|
| <b>Beijing</b>  | 0.02           | 0.02           | 0.02              |
| <b>Tianjin</b>  | 0.16           | 0.18           | 0.13              |
| <b>Hebei</b>    | 3.13           | 3.45           | 2.37              |
| <b>Shanxi</b>   | 0.80           | 0.68           | 0.38              |

|                       |      |      |      |
|-----------------------|------|------|------|
| <b>Inner Mongolia</b> | 1.14 | 0.96 | 0.67 |
| <b>Liaoning</b>       | 0.95 | 0.88 | 0.55 |
| <b>Jilin</b>          | 0.95 | 0.87 | 0.50 |
| <b>Heilongjiang</b>   | 1.16 | 1.11 | 0.77 |
| <b>Shanghai</b>       | 0.10 | 0.11 | 0.08 |
| <b>Jiangsu</b>        | 3.80 | 3.88 | 2.39 |
| <b>Zhejiang</b>       | 0.54 | 0.44 | 0.24 |
| <b>Anhui</b>          | 4.05 | 3.52 | 1.93 |
| <b>Fujian</b>         | 0.19 | 0.12 | 0.06 |
| <b>Jiangxi</b>        | 1.30 | 0.90 | 0.42 |
| <b>Shandong</b>       | 4.85 | 5.40 | 3.36 |
| <b>Henan</b>          | 6.11 | 6.04 | 3.65 |
| <b>Hubei</b>          | 3.20 | 2.47 | 1.39 |
| <b>Hunan</b>          | 1.79 | 1.29 | 0.64 |
| <b>Guangdong</b>      | 0.48 | 0.35 | 0.15 |
| <b>Guangxi</b>        | 0.64 | 0.47 | 0.32 |
| <b>Hainan</b>         | 0.06 | 0.04 | 0.03 |
| <b>Chongqing</b>      | 0.76 | 0.48 | 0.29 |
| <b>Sichuan</b>        | 3.26 | 2.47 | 1.67 |
| <b>Guizhou</b>        | 0.40 | 0.31 | 0.20 |
| <b>Yunnan</b>         | 1.05 | 1.01 | 0.92 |
| <b>Tibet</b>          | 0.03 | 0.03 | 0.03 |
| <b>Shaanxi</b>        | 0.66 | 0.54 | 0.30 |
| <b>Gansu</b>          | 0.42 | 0.37 | 0.25 |
| <b>Qinghai</b>        | 0.04 | 0.04 | 0.03 |
| <b>Ningxia</b>        | 0.20 | 0.18 | 0.12 |
| <b>Xinjiang</b>       | 1.43 | 1.37 | 1.16 |

---

132 **Table S7.** Detailed information of variables used for LightGBM model training in this study. ERA5:  
133 the fifth-generation European Centre for Medium-Range Weather Forecasts (ECMWF) reanalysis

dataset; MEIC: the Multiresolution Emission Inventory; SRTM: Shuttle Radar Topography Mission.

| Dataset type            | Variable                                    | Description                                                  | Spatial resolution | Temporal resolution | Time period | Data source     |
|-------------------------|---------------------------------------------|--------------------------------------------------------------|--------------------|---------------------|-------------|-----------------|
| O <sub>3</sub>          | GCHP_O <sub>3</sub>                         | Near-surface hourly O <sub>3</sub>                           | 2.0°×2.5°          | Hourly              | 2016-2018   | GCHP simulation |
| Anthropogenic emissions | NO <sub>x</sub>                             | Nitric oxide from anthropogenic sources                      | 0.25°×0.25°        | Monthly             | 2016-2018   | MEIC            |
|                         | CO                                          | Carbon monoxide from anthropogenic sources                   |                    |                     |             |                 |
|                         | NMVOC                                       | Non-methane volatile organic compounds from biogenic sources |                    |                     |             |                 |
| Meteorology             | T_2m                                        | Air temperature at 2 m                                       | 0.25°×0.25°        | Hourly              | 2016-2018   | ERA5            |
|                         | SLP                                         | Sea level pressure                                           |                    |                     |             |                 |
|                         | U_10m                                       | Zonal wind at 10 m                                           |                    |                     |             |                 |
|                         | U_850                                       | Zonal wind at 850 hPa                                        |                    |                     |             |                 |
|                         | V_10m                                       | Meridional wind at 10 m                                      |                    |                     |             |                 |
|                         | V_850                                       | Meridional wind at 850 hPa                                   |                    |                     |             |                 |
| SSRD                    | Incoming shortwave radiation at the surface |                                                              |                    |                     |             |                 |
|                         | RH                                          | Relative humidity                                            |                    |                     |             |                 |

|                |      |                        |                 |   |           |               |
|----------------|------|------------------------|-----------------|---|-----------|---------------|
| Land data      | LU   | Land use type          | 30 m × 30 m     | – | 2016-2018 | <sup>9</sup>  |
|                | TOPO | Digital elevation      | 1 km × 1 km     | – | –         | SRTM          |
| Auxiliary data | MOY  | Month of the year      | –               | – | –         | –             |
|                | DOH  | Hour of the day        | –               | – | –         | –             |
|                | GDP  | Gross domestic product | 1 km × 1 km     | – | 2016-2018 | <sup>10</sup> |
|                | Pop  | Pop density            | 30 arc × 30 arc | – | 2016-2018 | <sup>11</sup> |

135 **Table S8. Summary of all simulations with GCHP models.**

| Scenario                      | Abbreviation | Anthropogenic emissions                                                                         | Meteorological condition |
|-------------------------------|--------------|-------------------------------------------------------------------------------------------------|--------------------------|
| Present-day                   | CTRL         | Emissions in 2015                                                                               | 2015                     |
| Clean air                     | CA_2060      | Emissions in 2060 with additional air pollution control under the SSP1 assumption               | 2015                     |
|                               |              | Emissions in 2060 with additional climatic constraints under the SSP1 assumption                |                          |
| Carbon neutrality             | CN_2060      | Emissions in 2060 with integrated air pollution and climatic controls under the SSP1 assumption | 2015                     |
| Clean air + carbon neutrality | CA_CN_2060   | Emissions in 2060 with integrated air pollution and climatic controls under the SSP1 assumption | 2015                     |

136 **Table S9. Statistical relationships between relative yield (RY) and AOT40 from Feng <sup>13</sup>. RY is defined**  
 137 **as the ratio of ozone-affected yield to the unaffected yield at zero ozone exposure.**

| Crop  | Dose-yield relationship                                                                                                                                                               |
|-------|---------------------------------------------------------------------------------------------------------------------------------------------------------------------------------------|
| Maize | $RY = 1 - S [AOT40 + (40 - x) * 1.08 - (20.22 - 0.01264 x^2) / (1 + 0.207 AOT40 - 0.0001293 x^2 AOT40)] / [1 - S (22.98 - 1.08 x + 0.01264 x^2)],$ $S = 0.0068 \text{ and } x = 40.0$ |
| Wheat | $RY = 1 - S [AOT40 + (40 - x) * 1.08 - (20.22 - 0.01264 x^2) / (1 + 0.207 AOT40 - 0.0001293 x^2 AOT40)] / [1 - S (22.98 - 1.08 x + 0.01264 x^2)],$ $S = 0.0161 \text{ and } x = 26.5$ |

Rice  $RY = 1 - S [AOT40 + (40 - x) * 1.08 - (20.22 - 0.01264 x^2) / (1 + 0.207 AOT40 - 0.0001293 x^2 AOT40)] / [1 - S (22.98 - 1.08x + 0.01264 x^2)],$   
 $S = 0.0071$  for inbred cultivars,  
 $S = 0.0145$  for hybrid cultivars, and  
 $x = 19.4$  for both inbred and hybrid cultivars

---

138

139

140 **References**

- 141 1. Eastham, S. D. *et al.* GEOS-Chem High Performance (GCHP v11-02c): a next-generation  
142 implementation of the GEOS-Chem chemical transport model for massively parallel applications.  
143 *Geosci Model Dev* **11**, 2941–2953 (2018).
- 144 2. Martin, R. V. *et al.* Improved advection, resolution, performance, and community access in the  
145 new generation (version 13) of the high-performance GEOS-Chem global atmospheric chemistry  
146 model (GCHP). *Geosci. Model Dev.* **15**, 8731–8748 (2022).
- 147 3. Wesely, M. L. Parameterization of surface resistances to gaseous dry deposition in regional-scale  
148 numerical models. *Atmospheric Environ. 1967* **23**, 1293–1304 (1989).
- 149 4. Guenther, A. B. *et al.* The Model of Emissions of Gases and Aerosols from Nature version 2.1  
150 (MEGAN2.1): an extended and updated framework for modeling biogenic emissions. *Geosci*  
151 *Model Dev* **5**, 1471–1492 (2012).
- 152 5. van der Werf, G. R. *et al.* Global fire emissions estimates during 1997–2016. *Earth Syst Sci Data*  
153 **9**, 697–720 (2017).
- 154 6. Hoesly, R. M. *et al.* Historical (1750–2014) anthropogenic emissions of reactive gases and aerosols  
155 from the Community Emissions Data System (CEDS). *Geosci. Model Dev.* **11**, 369–408 (2018).
- 156 7. Chen, T. & Guestrin, C. XGBoost: A Scalable Tree Boosting System. (2016).
- 157 8. Li, H. *et al.* Ozone Pollution in China Affected by Climate Change in a Carbon Neutral Future as  
158 Predicted by a Process-Based Interpretable Machine Learning Method. *Geophys. Res. Lett.* **51**,  
159 e2024GL109520 (2024).
- 160 9. Yang, J. & Huang, X. The 30 m annual land cover dataset and its dynamics in China from 1990 to  
161 2019. *Earth Syst. Sci. Data* **13**, 3907–3925 (2021).

- 162 10. Chen, J. *et al.* Global 1 km × 1 km gridded revised real gross domestic product and electricity  
163 consumption during 1992–2019 based on calibrated nighttime light data. *Sci. Data* **9**, 202 (2022).
- 164 11. Liu, L., Cao, X., Li, S. & Jie, N. A 31-year (1990–2020) global gridded population dataset  
165 generated by cluster analysis and statistical learning. *Sci. Data* **11**, 124 (2024).
- 166 12. Mao, J. *et al.* Multidecadal ozone trends in China and implications for human health and crop  
167 yields: a hybrid approach combining a chemical transport model and machine learning. *Atmos*  
168 *Chem Phys* **24**, 345–366 (2024).
- 169 13. Feng, Z. *et al.* Ozone pollution threatens the production of major staple crops in East Asia. *Nat.*  
170 *Food* **3**, 47–56 (2022).

171
